# Supplementary material for: Generation and Selection of a Panel of Pan-Filovirus Single-Chain Antibodies using Cell-Free Ribosome Display
Source: PubMed Central journal article supplement (PMC6609206; doi:10.4269/ajtmh.18-0658), 2019-05-06
Supplement: tpmd180658.SD1.pdf [file tpmd180658.SD1.pdf]

**S1 Fig. Alignment of the derived aminoacids sequences of the randomly chosen scFvs from linked antibody library and complementary determining regions (CDRs).** FRs and CDRs are determined by the IMGT information system. Diversity was found predominantly in the CDR regions. A normal 20 amino acid linker [(G4S)4] joins the VH and VL chains. Alignments were **colour coded** according to residue property groups. AVFPMILW-red, DE-blue, RK-magenta, STYHCNGQ-green, others-grey.

Symbols in the alignment are as follows: (\*) indicates where there is a conserved amino acid; (:) indicates an amino acid position with conserved similarity; (.) indicates a semi-conserved amino substitution has occurred; (-) indicates spaces introduced to optimise the alignment.

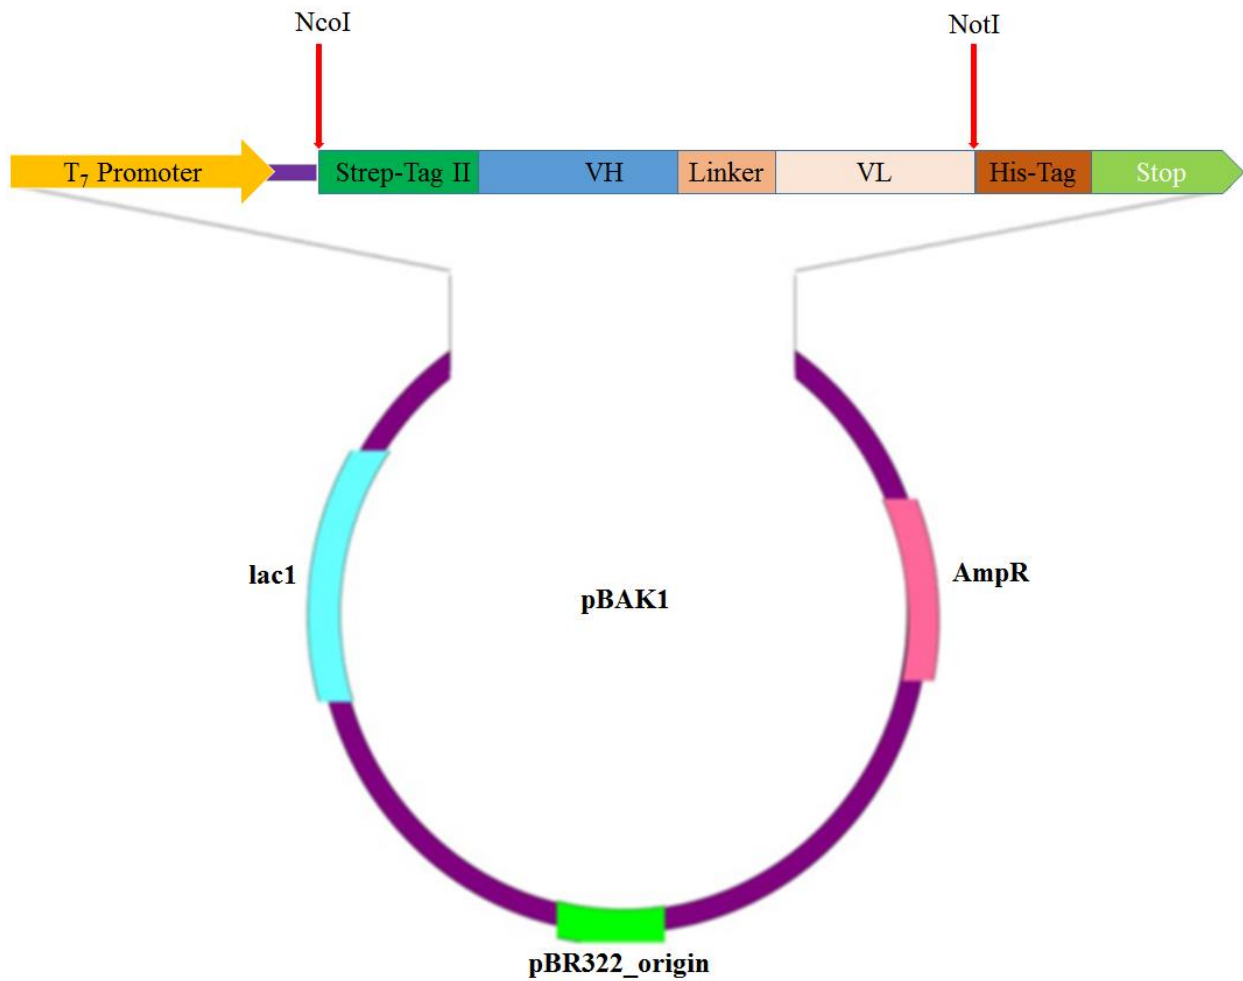

**S2 Fig. Schematic diagram of the pBAK1 (*anti-EbovGP-his-ScFv*) expression vector.** The position of the enzymatic cleavage is indicated by the *red arrow*. The gene encoding anti-EbovGP-his-ScFv protein was inserted into the pBAK1 vector under the control of the T7lac promoter, in frame with a strep tag II.

**S1 Table**  
**Nucleotide sequences of primers used.**

| Primer name | Primer sequence (5' – 3')                                                       |
|-------------|---------------------------------------------------------------------------------|
|             | <b>VH primers</b>                                                               |
| MVH_F1      | CGAGAAGACCGGCAGCGGTGGGGCAGAGCTTGTGAAGCCA                                        |
| MVH_F2      | CGAGAAGACCGGCAGCGGTGGAGGAGGCTTGATGCAACCT                                        |
| MVH_F3      | CGAGAAGACCGGCAGCGGTGGACCTGAGCTGGAGATGCCT                                        |
| MVH_F4      | CGAGAAGACCGGCAGCGGTGGACCTGGCCTGGTGAGACCT                                        |
| MVH_F5      | CGAGAAGACCGGCAGCGGTGGGGGAGGCTTAGTGAAGCCT                                        |
| MVH_F6      | CGAGAAGACCGGCAGCGGTGGGGCAGAGCTTGTGAAGCCA                                        |
| MVH_F7      | CGAGAAGACCGGCAGCGGTGGAGGGGGCTTGGTACAGCCT                                        |
| MVH_F8      | CGAGAAGACCGGCAGCGGTGGGGCAGAGCTTGTGAGGTCA                                        |
|             |                                                                                 |
| MVH_R1      | GGAGCCGCCGCCGCCGAGAACACCACCACC <u>GGATCC</u> ACCACCACCCGAG<br>GAAACGGTGACCGTGGT |
| MVH_R2      | GGAGCCGCCGCCGCCGAGAACACCACCACC <u>GGATCC</u> ACCACCACCCGAG<br>GAGACTGTGAGAGTGGT |
| MVH_R3      | GGAGCCGCCGCCGCCGAGAACACCACCACC <u>GGATCC</u> ACCACCACCCGCA<br>GAGACAGTGACCAGAGT |
| MVH_R4      | GGAGCCGCCGCCGCCGAGAACACCACCACC <u>GGATCC</u> ACCACCACCCGAG<br>GAGACGGTGACTGAGGT |
|             | <b>VL primers</b>                                                               |
| MVL_F1      | GGCGGCGGCGGCTCCGGTGGTGGT <u>GGATCC</u> GCAATCATGTCTGCATCTCC                     |
| MVL_F2      | GGCGGCGGCGGCTCCGGTGGTGGT <u>GGATCC</u> GCCTCCCTATCTGTATCTGTG                    |
| MVL_F3      | GGCGGCGGCGGCTCCGGTGGTGGT <u>GGATCC</u> GCCTCCCTATCTGCATCTGTG                    |
| MVL_F4      | GGCGGCGGCGGCTCCGGTGGTGGT <u>GGATCC</u> CTCACTTTGTCGGTTACCATT                    |
| MVL_F5      | GGCGGCGGCGGCTCCGGTGGTGGT <u>GGATCC</u> TCAGCCTCTTTCTCCCTGGGA                    |
| MVL_F6      | GGCGGCGGCGGCTCCGGTGGTGGT <u>GGATCC</u> CTCCTCCCTGAGTGTGTCAGCA                   |
| MVL_F7      | GGCGGCGGCGGCTCCGGTGGTGGT <u>GGATCC</u> CTCCTCCCTGCCTGTCAGTCTT                   |
| MVL_F8      | GGCGGCGGCGGCTCCGGTGGTGGT <u>GGATCC</u> CTCCTCCCTGCCTGTCAGTCTT                   |
|             |                                                                                 |
| MKR         | AGAACACTCATTCCTGTTGAAGCTCTTGACAATGGGTGAAGTTG                                    |
| MKR_Not I   | AGT <u>GCGGCCG</u> CAGAACACTCATCCTGTTGAAGCTCTTGACAATGGGTGAAGT<br>TG             |
|             | <b>Strep Tag II</b>                                                             |
| KzSTREP II  | CGAATTCCACCATGGCC TGG AGC CAT CCG CAG TTC GAG AAG ACC GGC<br>AGC GG             |
|             | <b>T7 promoter</b>                                                              |
| RDT7        | CTATAGAAGG GTAATACGACTCACTATAGGGCGAATTCCACCATGGCC                               |

**S2 Table****Cross-reactivity profiles of anti-EBOV GP scFvs from ELISA result.**

| scFv                                          | GP <sub>EBOV</sub> | GP <sub>SUDV</sub> | GP <sub>RESTV</sub> | GP <sub>BDBV</sub> | GP <sub>TAFV</sub> | GP <sub>MARV</sub> |
|-----------------------------------------------|--------------------|--------------------|---------------------|--------------------|--------------------|--------------------|
| 3-2                                           | +                  | +                  | -                   | -                  | +                  | +                  |
| 4-2                                           | +++                | +++                | ++                  | ++                 | ++                 | +++                |
| 10-3                                          | -                  | -                  | -                   | -                  | +                  | +                  |
| 13-1                                          | +                  | -                  | -                   | -                  | -                  | +                  |
| 16-1                                          | +                  | +                  | -                   | -                  | ++                 | +                  |
| 18-1                                          | +                  | +                  | ++                  | ++                 | ++                 | +                  |
| 22-1                                          | ++                 | +++                | ++                  | ++                 | ++                 | +++                |
| 27-5                                          | -                  | -                  | -                   | -                  | -                  | -                  |
| 35-2                                          | ++                 | ++                 | +                   | -                  | +                  | ++                 |
| 39-1                                          | ++                 | ++                 | -                   | +                  | +                  | ++                 |
| Mouse anti-Zaire ebola antibody 6D8           | +++                |                    |                     |                    |                    |                    |
| Mouse anti-Sudan ebola virus antibody         |                    | +++                |                     |                    |                    |                    |
| Rabbit anti-Reston GP polyclonal antibody     |                    |                    | +++                 |                    |                    |                    |
| Rabbit anti-Bundibugyo GP polyclonal antibody |                    |                    |                     | +++                |                    |                    |
| Rabbit anti-MARV GP polyclonal antibody       |                    |                    |                     |                    |                    | +++                |
| Rabbit anti-Tai Forest virus GP IgG           |                    |                    |                     |                    | +++                |                    |
| XfPilB21                                      | -                  | -                  | -                   | -                  | -                  | -                  |

†: GPs of each virus species were used as antigens. \*: scFv reactivity was evaluated based on ELISA OD450. +++: OD>1.0; ++: OD ≥ 1.0; +: 0.3 < OD < 1.0; -: OD ≤ 0.3. XfPilBscFv21: Negative control. Mouse anti-Zaire ebola antibody 6D8, Mouse anti-Sudan ebola virus antibody, Rabbit anti-Reston GP polyclonal antibody, Rabbit anti-Bundibugyo GP polyclonal antibody, Rabbit anti-MARV GP polyclonal antibody, and Rabbit anti-Tai Forest virus GP IgG: Positive controls.

**S3 Table 3**

**% CV & Bias around calculated EC-50.** Accuracy and precision around the calculated EC-50 values are within acceptable level.

| scFv4-2 vs GP <sub>EBOV</sub> |                 |                        |        | scFv4-2 vs GP <sub>SUDV</sub> |                        |       | scFv4-2 vs GP <sub>MARV</sub> |                        |        |
|-------------------------------|-----------------|------------------------|--------|-------------------------------|------------------------|-------|-------------------------------|------------------------|--------|
| µg/mL                         | Mean Absorbance | %CV of calculated conc | %BIAS  | Mean Absorbance               | %CV of calculated conc | %BIAS | Mean Absorbance               | %CV of calculated conc | %BIAS  |
| 30                            | 2.748           | 21.0                   | 1.2    | 2.121                         | 5.8                    | -5.1  | 2.847                         | 31.8                   | -1.9   |
| 20                            | 2.709           | 34.3                   | 10.4   | 2.030                         | 9.0                    | 4.7   | 2.816                         | 4.1                    | 2.4    |
| 15                            | 2.667           | 3.9                    | 0.1    | 1.916                         | 1.7                    | 5.1   | 2.756                         | 13.1                   | 5.9    |
| 10                            | 2.523           | 11.5                   | 4.4    | 1.613                         | 2.4                    | -5.4  | 2.523                         | 8.4                    | -0.4   |
| 5                             | 1.735           | 3.3                    | -0.4   | 1.117                         | 4.9                    | 2.2   | 1.627                         | 7.2                    | 0.3    |
| 1                             | 0.143           | 1.6                    | 8.5    | 0.170                         | 2.0                    | -3.7  | 0.067                         | 1.8                    | -0.4   |
| 0.1                           | 0.049           | 97.9                   | 3.8    | 0.006                         | 7.1                    | -0.2  | 0.0                           | 6.3                    | 18.1   |
| 0.01                          | 0.034           | Range?                 | Range? | 0.005                         | 12.7                   | 776.8 | 0.0                           | 6.0                    | 1019.1 |

**S4 Table. % CV & Bias around calculated EC-50.** Accuracy and precision around the calculated EC-50 values are within acceptable level.

| scFv4-2 vs GP <sub>BDBV</sub> |                 |                        |        | scFv4-2 vs GP <sub>RESTV</sub> |                        |        | scFv4-2 vs GP <sub>TAFV</sub> |                        |       |
|-------------------------------|-----------------|------------------------|--------|--------------------------------|------------------------|--------|-------------------------------|------------------------|-------|
| µg/ml                         | Mean Absorbance | %CV of calculated conc | %BIAS  | Mean Absorbance                | %CV of calculated conc | %BIAS  | Mean Absorbance               | %CV of calculated conc | %BIAS |
| 30                            | 1.286           | 4.2                    | -0.5   | 1.349                          | 10.1                   | 1.0    | 2.065                         | 6.4                    | -2.6  |
| 20                            | 1.199           | 13.0                   | 1.2    | 1.266                          | 15.0                   | 1.3    | 1.918                         | 16.4                   | 4.8   |
| 15                            | 1.087           | 5.1                    | 0.3    | 1.167                          | 0.6                    | 0.6    | 1.765                         | 5.7                    | 3.9   |
| 10                            | 0.832           | 3.4                    | 0.1    | 0.930                          | 5.5                    | 0.1    | 1.426                         | 2.7                    | -6.2  |
| 5                             | 0.328           | 0.3                    | -0.05  | 0.424                          | 0.2                    | -0.1   | 0.984                         | 0.8                    | 3.7   |
| 1                             | 0.020           | 4.9                    | 5.4    | 0.033                          | 5.5                    | 9.8    | 0.179                         | 1.5                    | -5.9  |
| 0.1                           | 0.009           | 54.4                   | 10.9   | 0.012                          | 17.5                   | 12.0   | 0.011                         | 4.6                    | 14.7  |
| 0.01                          | 0.008           | Range?                 | Range? | 0.008                          | 0                      | 5755.6 | 0.002                         | 7.0                    | 402.7 |

**S5 Table**

**% CV & Bias around calculated EC-50.** Accuracy and precision around the calculated EC-50 values are within acceptable level.

| scFv22-1 vs GP <sub>EBOV</sub> |                 |                        |        | scFv4-2 vs GP <sub>SUDV</sub> |                        |        | scFv4-2 vs GP <sub>MARV</sub> |                        |        |
|--------------------------------|-----------------|------------------------|--------|-------------------------------|------------------------|--------|-------------------------------|------------------------|--------|
| µg/ml                          | Mean Absorbance | %CV of calculated conc | %BIAS  | Mean Absorbance               | %CV of calculated conc | %BIAS  | Mean Absorbance               | %CV of calculated conc | %BIAS  |
| 30                             | 2.711           | 6.3                    | 0.2    | 1.937                         | 23.9                   | 3.2    | 1.636                         | 12.8                   | 0.8    |
| 20                             | 2.497           | 13.2                   | 4.0    | 1.763                         | 4.3                    | 0.3    | 1.592                         | 8.2                    | 2.3    |
| 15                             | 2.261           | 6.2                    | 0.263  | 1.593                         | 5.6                    | 0.3    | 1.507                         | 9.0                    | 0.2    |
| 10                             | 1.835           | 5.3                    | -5.0   | 1.301                         | 0.9                    | 0.368  | 1.269                         | 6.5                    | 0.5    |
| 5                              | 1.235           | 5.4                    | 5.5    | 0.749                         | 1.7                    | -0.697 | 0.530                         | 9.0                    | -0.1   |
| 1                              | 0.184           | 0.8                    | -18.0  | 0.124                         | 3.6                    | 5.3    | 0.020                         | 4.2                    | 18.2   |
| 0.1                            | 0.035           | 12.0                   | 16.0   | 0.020                         | 23.4                   | -16.0  | 0.006                         | 16.2                   | 18.6   |
| 0.01                           | 0.059           | 73.8                   | 3133.1 | 0.012                         | 0                      | 307.5  | 0.001                         | Range?                 | Range? |

**S6 Table.**

**% CV & Bias around calculated EC-50.** Accuracy and precision around the calculated EC-50 values are within acceptable level.

| scFv4-2 vs GP <sub>BDBV</sub> |                 |                        |        | scFv4-2 vs GP <sub>RESTV</sub> |                        |        | scFv4-2 vs GP <sub>TAFV</sub> |                        |        |
|-------------------------------|-----------------|------------------------|--------|--------------------------------|------------------------|--------|-------------------------------|------------------------|--------|
| µg/ml                         | Mean Absorbance | %CV of calculated conc | %BIAS  | Mean Absorbance                | %CV of calculated conc | %BIAS  | Mean Absorbance               | %CV of calculated conc | %BIAS  |
| 30                            | 1.838           | 9.1                    | -5.1   | 1.872                          | 8.2                    | -1.4   | 1.508                         | 11.2                   | -4.6   |
| 20                            | 1.688           | 3.0                    | 0.3    | 1.706                          | 2.1                    | 1.2    | 1.366                         | 3.1                    | 7.9    |
| 15                            | 1.465           | 1.0                    | 3.6    | 1.513                          | 12.3                   | 1.9    | 1.141                         | 1.9                    | 1.0    |
| 10                            | 0.813           | 0.4                    | -3.0   | 1.134                          | 0.8                    | -1.0   | 0.800                         | 1.7                    | -6.4   |
| 5                             | 0.231           | 1.5                    | 10.4   | 0.521                          | 1.0                    | 0.3    | 0.445                         | 14.3                   | 5.0    |
| 1                             | 0.027           | 9.4                    | 2.7    | 0.060                          | 9.6                    | 18.7   | 0.069                         | 11.8                   | 8.9    |
| 0.1                           | 0.017           | Range?                 | Range? | 0.019                          | 1.8                    | 4.3    | 0.023                         | 85.0                   | -24.9  |
| 0.01                          | 0.004           | Range?                 | Range? | 0.008                          | Range?                 | Range? | 0.012                         | Range?                 | Range? |

**S7 Table**

**Apparent affinity and maximal binding of EBOVGP scFvs to GP<sub>ZEBOV</sub>, GP<sub>SUDV</sub>, GP<sub>RESTV</sub>, GP<sub>BDBV</sub>, GP<sub>TAFV</sub> and GP<sub>MARV</sub>.**

| GP    | scFv4-2                       |                                                  | scFv22-1                      |                                                  |
|-------|-------------------------------|--------------------------------------------------|-------------------------------|--------------------------------------------------|
|       | <i>K<sub>d,app</sub></i> (μg) | <i>B<sub>max</sub></i> signal (10 <sup>5</sup> ) | <i>K<sub>d,app</sub></i> (μg) | <i>B<sub>max</sub></i> signal (10 <sup>5</sup> ) |
| ZEBOV | 4.8 ± 1.5                     | 3.5 ± 0.3                                        | 9.3 ± 1.2                     | 3.7 ± 0.2                                        |
| SUDV  | 6.6 ± 0.9                     | 2.8 ± 0.1                                        | 10.8 ± 1.6                    | 2.8 ± 0.2                                        |
| RESTV | 12.2 ± 3.4                    | 2.1 ± 0.2                                        | 17.4 ± 4.2                    | 3.2 ± 0.4                                        |
| BDBV  | 15.1 ± 4.8                    | 2.2 ± 0.3                                        | 38 ± 23                       | 4.6 ± 1.8                                        |
| TAFV  | 8.2 ± 0.8                     | 2.8 ± 0.1                                        | 19.3 ± 4.3                    | 2.7 ± 0.3                                        |
| MARV  | 5.9 ± 1.8                     | 3.8 ± 0.3                                        | 10.8 ± 3.8                    | 2.5 ± 0.3                                        |

The values for apparent affinity (*K<sub>d,app</sub>*) and maximal binding (*B<sub>max</sub>*, shown as relative absorbance units) were derived from the ELISAs with GP<sub>ZEBOV</sub>, GP<sub>SUDV</sub>, GP<sub>RESTV</sub>, GP<sub>BDBV</sub>, GP<sub>TAFV</sub> and GP<sub>MARV</sub>. Values are averages (and ranges) of three experiments.
